# Supplementary material for: The impact of hypoglycaemia on daily functioning among adults with diabetes: a prospective observational study using the Hypo-METRICS app
Source: PubMed Central journal article supplement (PMC11447150; doi:10.1007/s00125-024-06233-1), 2024-07-30
Supplement: 125_2024_6233_MOESM1_ESM.pdf [file 125_2024_6233_MOESM1_ESM.pdf]

## Electronic supplementary material:

### Overview:

- **Page 2:** ESM Table 1: Overview of Hypo-METRICS app daily functioning content
- **Page 5:** ESM Table 2: Control variables used in adjusted models
- **Page 6:** ESM Table 3: Distribution of PRH and SDH
- **Page 8:** ESM Figure 1: Categorisation of person-reported hypoglycaemia (PRH)

ESM Table 1: Overview of Hypo-METRICS app daily functioning content

| The three daily check-ins                                                                                                                             |                                             |                                                                 |                                     |           |         |
|-------------------------------------------------------------------------------------------------------------------------------------------------------|---------------------------------------------|-----------------------------------------------------------------|-------------------------------------|-----------|---------|
| Module names <sup>1</sup> and items                                                                                                                   | Response option                             | Domains <sup>2</sup>                                            | Completion timepoints ('Check-ins') |           |         |
|                                                                                                                                                       |                                             |                                                                 | Morning                             | Afternoon | Evening |
| <b>Sleep quality module (2 items)</b>                                                                                                                 |                                             |                                                                 |                                     |           |         |
| 1. How well did you sleep?                                                                                                                            | Extremely badly (0) – Extremely well (10)   | Sleep quality (1/2)                                             | x                                   |           |         |
| 2. When you woke up how did you feel?                                                                                                                 | Extremely tired (0) – Extremely rested (10) | Sleep quality (2/2)                                             | x                                   |           |         |
| <b>General well-being module (7 items)</b>                                                                                                            |                                             |                                                                 |                                     |           |         |
| 3. How is your mood right now?                                                                                                                        | Extremely bad (0) – Extremely good (10)     | Overall mood (1/1)                                              | x                                   | x         | x       |
| 4. How anxious do you feel right now? <sup>3</sup>                                                                                                    | Not at all (0) - Extremely (10)             | Negative affect (1/2)                                           | x                                   | x         | x       |
| 5. How irritable do you feel right now? <sup>3</sup>                                                                                                  | Not at all (0) - Extremely (10)             | Negative affect (2/2)                                           | x                                   | x         | x       |
| 6. How is your energy level right now?                                                                                                                | Extremely low (0) – Extremely high (10)     | Energy level (1/1)                                              | x                                   | x         | x       |
| 7. How alert do you feel right now?                                                                                                                   | Not at all (0) - Extremely (10)             | Cognitive functioning (1/2)                                     | x                                   | x         | x       |
| 8. How well are you able to concentrate right now?                                                                                                    | Not at all (0) - Extremely (10)             | Cognitive functioning (2/2)                                     | x                                   | x         | x       |
| 8. How easy was it for you to remember things today?                                                                                                  | Not at all (0) - Extremely (10)             | Memory (today) (1/1)                                            |                                     |           | x       |
| <b>Fear of hypo-/hyperglycaemia module (4 items)</b>                                                                                                  |                                             |                                                                 |                                     |           |         |
| 10. How worried are you about having a hypo later today? <sup>3</sup>                                                                                 | Not at all (0) - Extremely (10)             | Fear of hypoglycaemia later today (1/1)                         | x                                   | x         |         |
| 11. How worried are you about having high blood glucose later today? <sup>3</sup>                                                                     | Not at all (0) - Extremely (10)             | Fear of hyperglycaemia later today (1/1)                        | x                                   | x         |         |
| 12. How worried are you about having a hypo while asleep? <sup>3</sup>                                                                                | Not at all (0) - Extremely (10)             | Fear of hypoglycaemia while asleep (1/1)                        |                                     |           | x       |
| 13. How worried are you about having high blood glucose while asleep? <sup>3</sup>                                                                    | Not at all (0) – Extremely (10)             | Fear of hyperglycaemia while asleep (1/1)                       |                                     |           | x       |
| <b>Social interactions module (1 item)</b>                                                                                                            |                                             |                                                                 |                                     |           |         |
| 14. How well did you get along with other people today?                                                                                               | Extremely badly (0) – Extremely well (10)   | Social functioning (1/1)                                        |                                     |           | x       |
| <b>Work and productivity module (4 items)</b>                                                                                                         |                                             |                                                                 |                                     |           |         |
| 15. How many hours did you work today?                                                                                                                | (Select hours / minute)                     | Hours worked <sup>4</sup> (1/1)                                 |                                     |           | x       |
| 16. How many hours did you miss from work for ANY reason today? [this includes health issues, vacation, holiday, etc.]                                | (Select hours / minute)                     | Hours missed from work <sup>4</sup> (1/1)                       |                                     |           | x       |
| 17. How many hours did you miss from activities other than work today for ANY reason (e.g. study, housework, shopping, family or leisure activities)? | (Select hours / minute)                     | Hours missed from other activities than work <sup>4</sup> (1/1) |                                     |           | x       |

|                                                                                                      |                                                                                                                                                                                                                                                                                                                                                                                                                |                           |   |  |   |
|------------------------------------------------------------------------------------------------------|----------------------------------------------------------------------------------------------------------------------------------------------------------------------------------------------------------------------------------------------------------------------------------------------------------------------------------------------------------------------------------------------------------------|---------------------------|---|--|---|
| 18. How productive were you while working today?                                                     | Extremely unproductive (0) – Extremely productive (10)                                                                                                                                                                                                                                                                                                                                                         | Productivity <sup>4</sup> |   |  | x |
| <b>Self-report of hypos while asleep module (8 items)</b>                                            |                                                                                                                                                                                                                                                                                                                                                                                                                |                           |   |  |   |
| 19. During the night, did you have a hypo OR take action to prevent a hypo that was about to happen? | Yes, No, Not sure                                                                                                                                                                                                                                                                                                                                                                                              | NA                        | x |  |   |
| 20. How many hypos did you have?                                                                     | (Select number)                                                                                                                                                                                                                                                                                                                                                                                                | NA                        | x |  |   |
| 21. At what time did this happen?                                                                    | (Select hour / minute)                                                                                                                                                                                                                                                                                                                                                                                         | NA                        | x |  |   |
| 22. How did you detect your hypo or a hypo that was about to happen? (Select all that apply)         | <ul style="list-style-type: none"> <li>- I had symptoms</li> <li>- Someone told me they thought I might be having a hypo</li> <li>- I did a finger prick check (SMBG)</li> <li>- I checked my sensor</li> <li>- My sensor alarmed</li> <li>- I "just knew"</li> <li>- I slept through it – and realised when I woke up</li> <li>- Other:</li> </ul>                                                            | NA                        | x |  |   |
| 23. What happened? (Select all that apply)                                                           | <ul style="list-style-type: none"> <li>- I ate / drank to prevent a hypo</li> <li>- I ate / drank to treat a hypo</li> <li>- I reduced insulin</li> <li>-Someone else gave me something to eat/drink</li> <li>-Someone else gave me glucagon</li> <li>-An ambulance was called</li> <li>-I was admitted to hospital</li> <li>-I took no action</li> <li>-None of the above</li> <li>-Skip questions</li> </ul> | NA                        | x |  |   |
| 24. Overall: How bothersome was hypoglycaemia for you last night? <sup>5</sup>                       | Not at all (0) – Extremely (10)                                                                                                                                                                                                                                                                                                                                                                                | NA                        | x |  |   |
| 25. Overall: How much sleep did you lose due to hypoglycaemia? <sup>5</sup>                          | (Select hour / minute)                                                                                                                                                                                                                                                                                                                                                                                         | NA                        | x |  |   |
| 26. Overall: How worried were you about going back to sleep? <sup>5</sup>                            | Not at all – Extremely (10)                                                                                                                                                                                                                                                                                                                                                                                    | NA                        | x |  |   |
| <b>Self-report of daytime hypos module (7 items)</b>                                                 |                                                                                                                                                                                                                                                                                                                                                                                                                |                           |   |  |   |
| 27. Today, did you have a hypo OR take action to prevent a hypo that was about to happen?            | Yes, No, Not sure                                                                                                                                                                                                                                                                                                                                                                                              | NA                        |   |  | x |
| 20.1 How many hypos did you have?                                                                    | (Select number)                                                                                                                                                                                                                                                                                                                                                                                                | NA                        |   |  | x |
| 21.1 At what time did this happen?                                                                   | (Select hour / minute)                                                                                                                                                                                                                                                                                                                                                                                         | NA                        |   |  | x |
| 22.1 How did you detect your hypo or a hypo that was about to happen?                                | - I had symptoms                                                                                                                                                                                                                                                                                                                                                                                               | NA                        |   |  | x |

|                                                                                            |                                                                                                                                                                                                                                                                                                                                                                                                                |    |  |  |   |
|--------------------------------------------------------------------------------------------|----------------------------------------------------------------------------------------------------------------------------------------------------------------------------------------------------------------------------------------------------------------------------------------------------------------------------------------------------------------------------------------------------------------|----|--|--|---|
|                                                                                            | <ul style="list-style-type: none"> <li>- Someone told me they thought I might be having a hypo</li> <li>- I did a finger prick check (SMBG)</li> <li>- I checked my sensor</li> <li>- My sensor alarmed</li> <li>- I "just knew"</li> <li>- Other:</li> </ul>                                                                                                                                                  |    |  |  |   |
| 23.1 What happened?                                                                        | <ul style="list-style-type: none"> <li>- I ate / drank to prevent a hypo</li> <li>- I ate / drank to treat a hypo</li> <li>- I reduced insulin</li> <li>-Someone else gave me something to eat/drink</li> <li>-Someone else gave me glucagon</li> <li>-An ambulance was called</li> <li>-I was admitted to hospital</li> <li>-I took no action</li> <li>-None of the above</li> <li>-Skip questions</li> </ul> | NA |  |  | x |
| 28. Overall: How bothersome was hypoglycaemia for you today? <sup>5</sup>                  | Not at all (0) – Extremely (10)                                                                                                                                                                                                                                                                                                                                                                                | NA |  |  | x |
| 29. Overall: How long was it before you were feeling your "usual self" again? <sup>5</sup> | (Select hour / minute)                                                                                                                                                                                                                                                                                                                                                                                         | NA |  |  | x |

<sup>1</sup>Module names refer to the titles used in the app when presenting the items (i.e., what the study participant would see)

<sup>2</sup>Domains refer to individual items or subscales (developed based on psychometric properties [1]) that was used for analysis; for example the domain 'Sleep quality' is a subscale consisting of two individual items, while the domain 'Overall mood' consist of just one item. Subscales were created taking a mean of the individual item scores.

<sup>3</sup>Scores on certain items (anxiety, irritability, and fear related items) were reversed, so that a higher score indicate improvement (i.e., less anxiety, irritability, or fear). This was to align that an increase in scores on all items would indicate improvement of daily functioning.

<sup>4</sup>Only the Productivity domain from the Work and productivity module were included for analysis in this paper (as the remaining items had a different response scale with hour and minute input; these will be included in other Hypo-RESOLVE publications focusing on health economic impact from hypoglycaemia).

<sup>5</sup>These items were not included in the current analysis (with comparison of days/nights with vs. without hypoglycaemia), as these items where only asked on days/nights with hypoglycaemia and therefore do not allow for a comparison with days/nights without hypoglycaemia.

**ESM Table 2: Control variables used in adjusted models**

|                                    |                                                                                                                                                                                      |
|------------------------------------|--------------------------------------------------------------------------------------------------------------------------------------------------------------------------------------|
| <b>Baseline demographics</b>       | Gender                                                                                                                                                                               |
|                                    | Age                                                                                                                                                                                  |
| <b>Clinical factors</b>            | Duration of insulin therapy                                                                                                                                                          |
|                                    | Impaired awareness of hypoglycaemia (Gold score)                                                                                                                                     |
|                                    | Time above range (in each time interval)                                                                                                                                             |
|                                    | Severe hypoglycaemia in past 12 months (baseline)                                                                                                                                    |
|                                    | Usual means of glucose monitoring (capillary blood glucose monitoring only (fingerprick), continuous glucose monitoring without alerts or continuous glucose monitoring with alerts) |
| <b>Psychological factors</b>       | Anxiety symptoms baseline (GAD 7)                                                                                                                                                    |
|                                    | Depressive symptoms baseline (PHQ-9)                                                                                                                                                 |
|                                    | Diabetes-specific QoL baseline (DIDP)                                                                                                                                                |
|                                    | Cognitive functioning baseline (PDQ-20)                                                                                                                                              |
|                                    | Diabetes distress baseline (PAID 20)                                                                                                                                                 |
|                                    | Hypoglycaemia fear baseline (HFS-II)                                                                                                                                                 |
| <b>Hypo-METRICS app completion</b> | Percentage number of morning and evening check-ins completed.                                                                                                                        |

**ESM Table 3: Distribution of PRH and SDH**

|                                                | Type 1, N = 19,180 <sup>1</sup> | Type 2, N = 22,400 <sup>1</sup> | p-value <sup>2</sup> |
|------------------------------------------------|---------------------------------|---------------------------------|----------------------|
| <b>Night-time hypoglycaemia</b>                |                                 |                                 |                      |
| <b>Distribution of PRH and SDH, night-time</b> |                                 |                                 | <0.001               |
| Type A: PRH (-)   SDH (-)                      | 9,435 (63%)                     | 14,015 (79%)                    |                      |
| Type B: PRH (-)   SDH (+)                      | 3,130 (21%)                     | 2,383 (14%)                     |                      |
| Type C: PRH (+)   SDH (-)                      | 542 (3.6%)                      | 493 (2.8%)                      |                      |
| Type D: PRH (+)   SDH (+)                      | 1,773 (12%)                     | 748 (4.2%)                      |                      |
| (Missing)                                      | 4,300                           | 4,761                           |                      |
| <b>PRH subtypes, night-time</b>                |                                 |                                 | <0.001               |
| No PRH                                         | 12,565 (85%)                    | 16,398 (93%)                    |                      |
| Asymptomatic other PRH                         | 379 (2.6%)                      | 260 (1.5%)                      |                      |
| Asymptomatic prevented PRH                     | 259 (1.7%)                      | 142 (0.8%)                      |                      |
| Asymptomatic treated PRH                       | 596 (4.0%)                      | 216 (1.2%)                      |                      |
| Symptomatic other PRH                          | 50 (0.3%)                       | 32 (0.2%)                       |                      |
| Symptomatic prevented PRH                      | 143 (1.0%)                      | 160 (0.9%)                      |                      |
| Symptomatic treated PRH                        | 815 (5.5%)                      | 385 (2.2%)                      |                      |
| (Missing)                                      | 4,373                           | 4,807                           |                      |
| <b>SDH subtypes, night-time</b>                |                                 |                                 | <0.001               |
| No SDH                                         | 11,351 (67%)                    | 16,495 (83%)                    |                      |
| SDH <3.9 mmol/L                                | 3,588 (21%)                     | 2,645 (13%)                     |                      |
| SDH <3.0 mmol/L                                | 1,771 (11%)                     | 774 (3.9%)                      |                      |
| SDH ≤2.2 mmol/L                                | 116 (0.7%)                      | 43 (0.2%)                       |                      |
| (Missing)                                      | 2,354                           | 2,443                           |                      |
| <b>Daytime hypoglycaemia</b>                   |                                 |                                 |                      |
| <b>Distribution of PRH and SDH, daytime</b>    |                                 |                                 | <0.001               |
| Type A: PRH (-)   SDH (-)                      | 6,966 (45%)                     | 14,758 (80%)                    |                      |
| Type B: PRH (-)   SDH (+)                      | 2,339 (15%)                     | 1,465 (7.9%)                    |                      |
| Type C: PRH (+)   SDH (-)                      | 1,887 (12%)                     | 1,248 (6.7%)                    |                      |
| Type D: PRH (+)   SDH (+)                      | 4,233 (27%)                     | 1,076 (5.8%)                    |                      |
| (Missing)                                      | 3,755                           | 3,853                           |                      |
| <b>PRH subtypes, daytime</b>                   |                                 |                                 | <0.001               |

|                              |             |              |        |
|------------------------------|-------------|--------------|--------|
| No PRH                       | 9,305 (61%) | 16,223 (88%) |        |
| Asymptomatic other PRH       | 109 (0.7%)  | 92 (0.5%)    |        |
| Asymptomatic prevented PRH   | 461 (3.0%)  | 189 (1.0%)   |        |
| Asymptomatic treated PRH     | 948 (6.2%)  | 362 (2.0%)   |        |
| Symptomatic other PRH        | 39 (0.3%)   | 25 (0.1%)    |        |
| Symptomatic prevented PRH    | 801 (5.2%)  | 517 (2.8%)   |        |
| Symptomatic treated PRH      | 3,646 (24%) | 1,094 (5.9%) |        |
| (Missing)                    | 3,871       | 3,898        |        |
| <b>SDH subtypes, daytime</b> |             |              | <0.001 |
| No SDH                       | 9,742 (58%) | 17,294 (86%) |        |
| SDH <3.9 mmol/L              | 5,358 (32%) | 2,370 (12%)  |        |
| SDH <3.0 mmol/L              | 1,707 (10%) | 348 (1.7%)   |        |
| SDH ≤2.2 mmol/L              | 59 (0.3%)   | 7 (<0.1%)    |        |
| (Missing)                    | 2,314       | 2,381        |        |

<sup>1</sup> n (%)

<sup>2</sup> Pearson's Chi-squared test

Please note: The submission times of each morning and evening check-in were used to divide each 24-hour period into night-time and daytime intervals. For each participant, each time-interval was categorised by presence (+) or absence (-) of PRH and/or SDH. Each time interval had valid data if information about PRH was reported in the app (i.e., non-missing), and ≥70% SDH data were available for that time-interval. The percentage in brackets above refers to the distribution of time-intervals with valid data. For example, when considering the “Distribution of PRH and SDH, night-time” for people with type 1 diabetes above: out of a total of 19,180 possible night-time intervals, 4,300 intervals had missing (non-valid) data, and of the remaining valid intervals, 63% of these were coded as Type A (no PRH or SDH recorded), 21% were coded as Type B (only SDH recorded), 3.6% were coded as Type C (only PRH recorded), and 12% coded as Type D (PRH and SDH).

**ESM Figure 1: Categorisation of person-reported hypoglycaemia (PRH)**

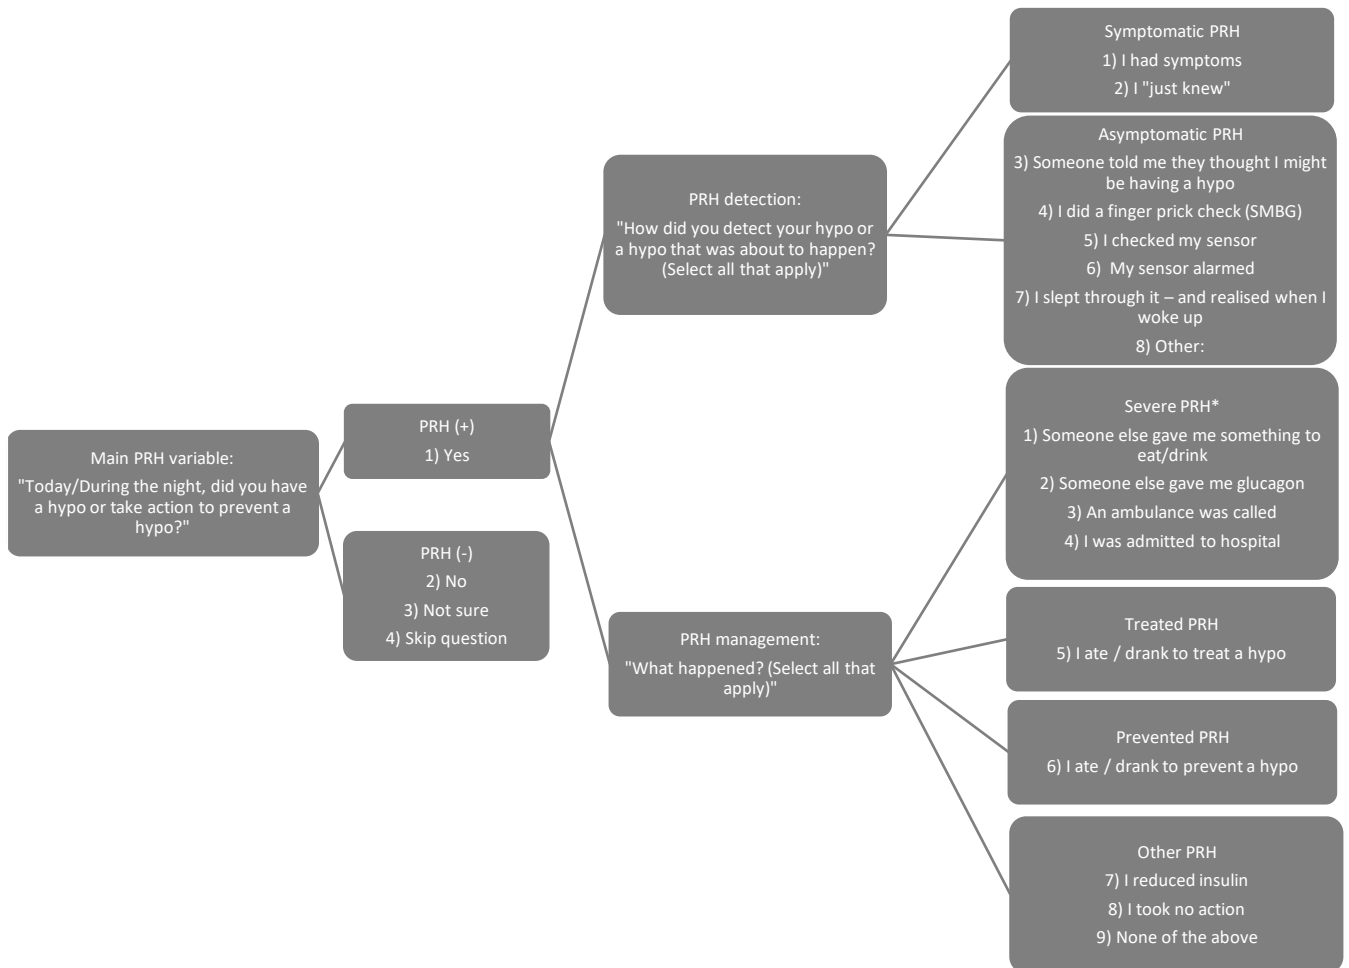

**Ranking for PRH:** Three separate variables were produced to represent PRH. As multiple PRH's could be reported for each night and daytime interval, an ordered ranking system was developed allowing each night and day to be labelled with the type of PRH that was hypothesised to have the most negative impact on daily functioning. PRH with the hypothesised most negative impact is listed towards the top of the figure; for example a PRH(+) would rank higher than a PRH(-) in the first variable, a 'Symptomatic PRH' would rank higher than a 'Asymptomatic PRH' in the second variable, and a 'Treated PRH' would rank higher than a 'Prevented PRH' in the third variable.



1. Sørholm, U., et al., *Psychometric properties of an innovative smartphone application to investigate the daily impact of hypoglycemia in people with type 1 or type 2 diabetes: The Hypo-METRICS app*. PLoS One, 2023. **18**(3): p. e0283148.

| Participant No |                 | Participant organisation name                  | Scientific person(s) in charge               |
|----------------|-----------------|------------------------------------------------|----------------------------------------------|
| 1              | RADBOUDUMC(Coo) | STICHTING RADBOUD UNIVERSITAIR MEDISCH CENTRUM | Prof. Cees Tack<br>Dr Bastiaan de Galan      |
| 2              | KCL             | King's College London                          | Prof. Stephanie Amiel<br>Dr Pratik Choudhary |
| 3              | MUG             | Medical University of Graz                     | Prof. Thomas Pieber<br>Dr Julia Mader        |
| 4              | UCAM            | University of Cambridge                        | Dr Mark Evans                                |
| 5              | CHUM            | Montpellier University Hospital                | Prof. Eric Renard                            |
| 6              | SDU             | University of Southern Denmark                 | Prof. Frans Pouwer<br>Prof. Jane Speight     |
| 7              | UNIL            | University of Lausanne                         | Prof. Bernard Thorens                        |
| 8              | USFD            | University of Sheffield                        | Prof. Simon Heller<br>Prof. Alan Brennan     |
| 9              | NOH             | Nordsjællands University Hospital Hillerød     | Prof. Ulrik Pedersen-Bjergaard               |
| 10             | UNIVDUN         | University of Dundee                           | Prof. Rory McCrimmon                         |
| 11             | Eurice          | European Research and Project Office GmbH      | Jakob Haardt                                 |
| 12             | SIB             | Swiss Institute of Bioinformatics              | Dr Mark Ibberson                             |

|    |             |                                                     |                          |
|----|-------------|-----------------------------------------------------|--------------------------|
| 13 | UNIPD       | University of Padova                                | Prof. Giovanni Sparacino |
| 14 | UEDIN       | University of Edinburgh                             | Prof. Helen Colhoun      |
| 15 | NN          | Novo Nordisk A/S                                    | Dr Stephen Gough         |
| 16 | Lilly       | Eli Lilly and Company Limited                       | Dr Zvonko Milicevic      |
| 18 | Abbott      | Abbott Laboratories                                 | Dr Mahmood Kazemi        |
| 19 | MDT         | Medtronic International Trading Sàrl                | Dr Ohad Cohen            |
| 20 | JDRF        | JDRF International                                  | Dr Sanjoy Dutta          |
| 21 | IDF         | International Diabetes Federation                   | Dominique Robert         |
| 22 | T1DExchange | Unitio, Inc.                                        | Dr Wendy Wolf            |
| 23 | HCT         | The Leona M. and Harry B. Helmsley Charitable Trust | Dr Sean Sullivan         |
